# Supplementary material for: A Study on Photostability of Amphetamines and Ketamine in Hair Irradiated under Artificial Sunlight
Source: MDPI journal article supplement (doi:10.3390/brainsci8060096), 2018-05-28
Supplement: s1 [file s1]

**Supplementary figures (S1A1-S1F2)**

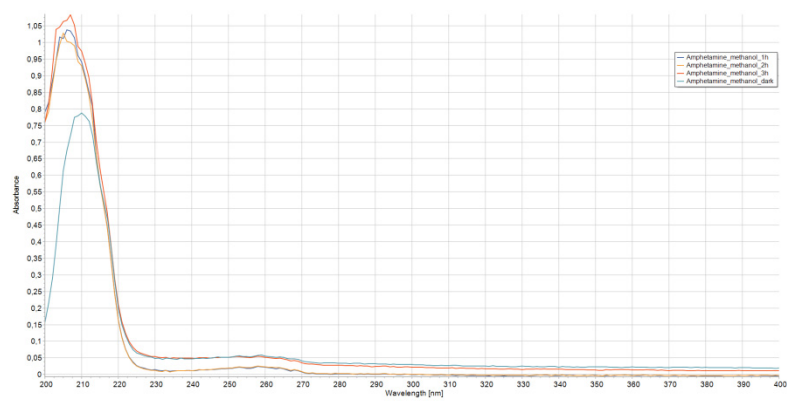

**Figure S1A1**

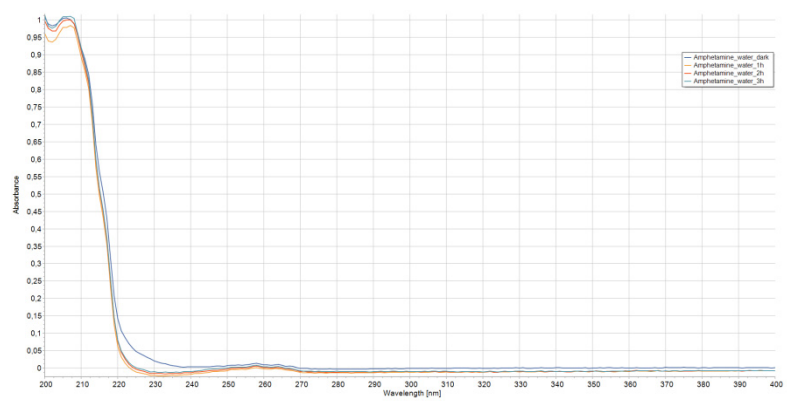

**Figure S1A2**

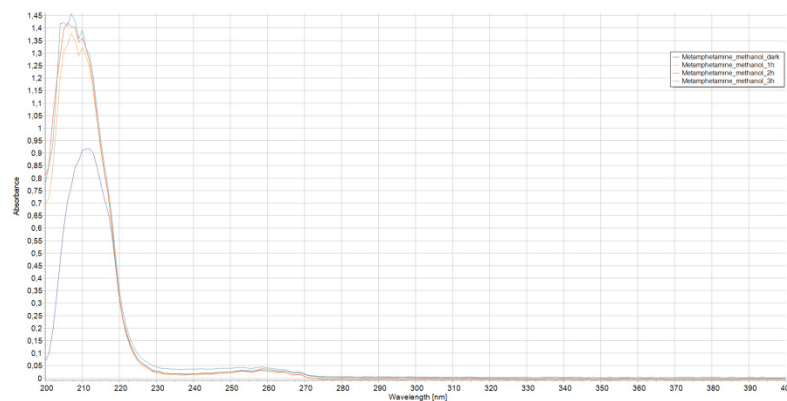

**Figure S1B1**

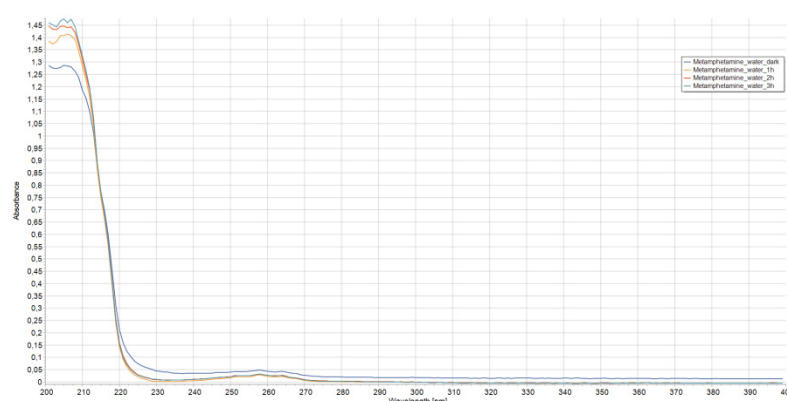

**Figure S1B2**

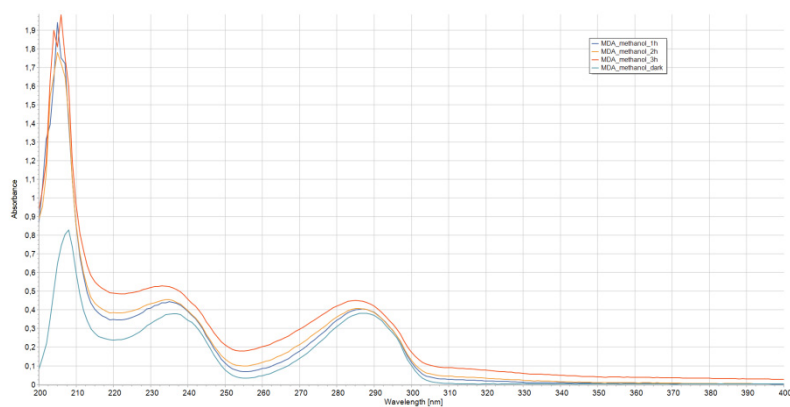

**Figure S1C1**

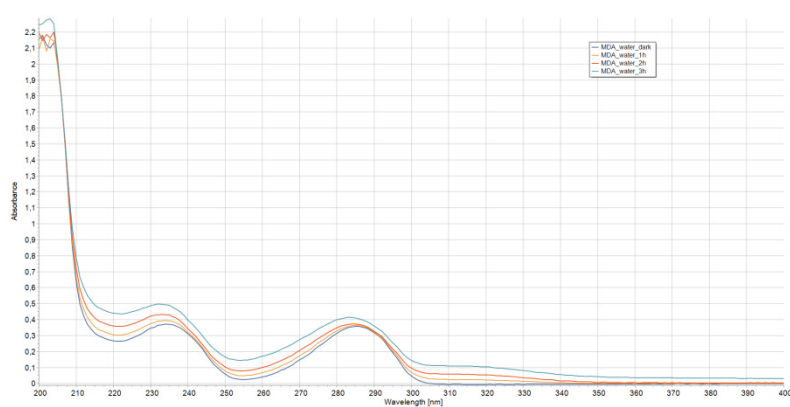

**Figure S1C2**

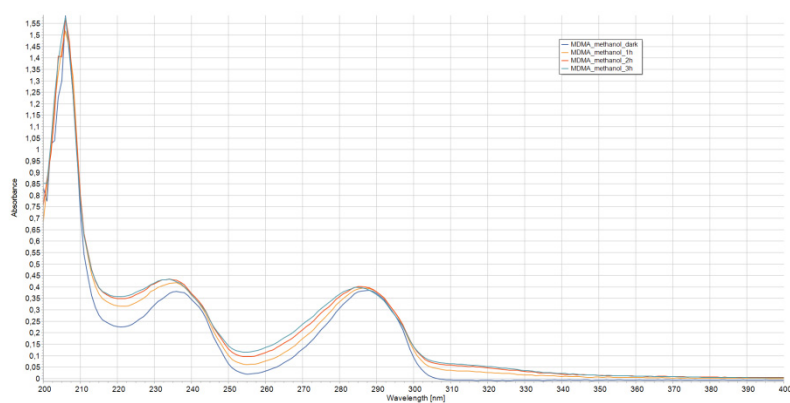

**Figure S1D1**

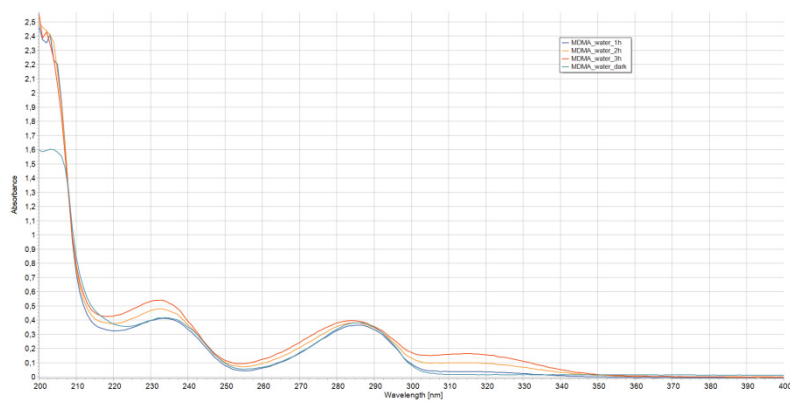

**Figure S1D2**

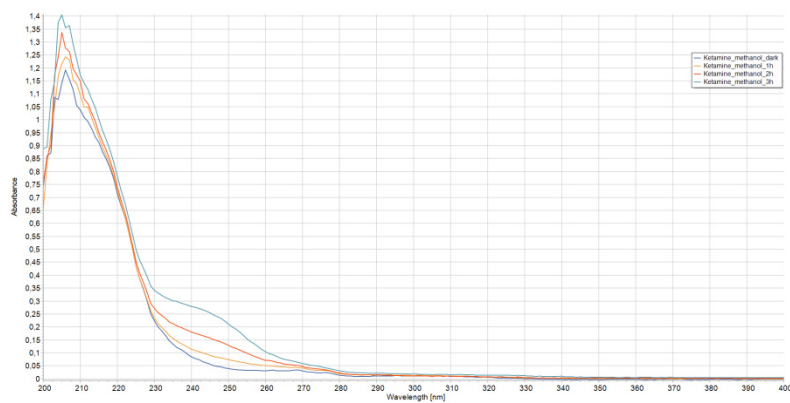

**Figure S1E1**

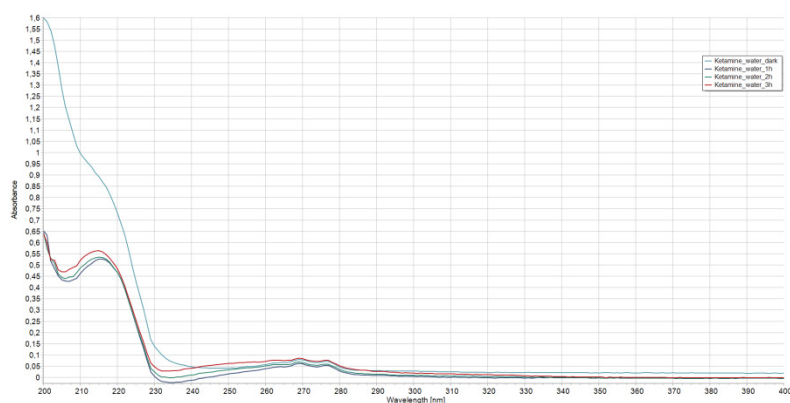

**Figure S1E2**

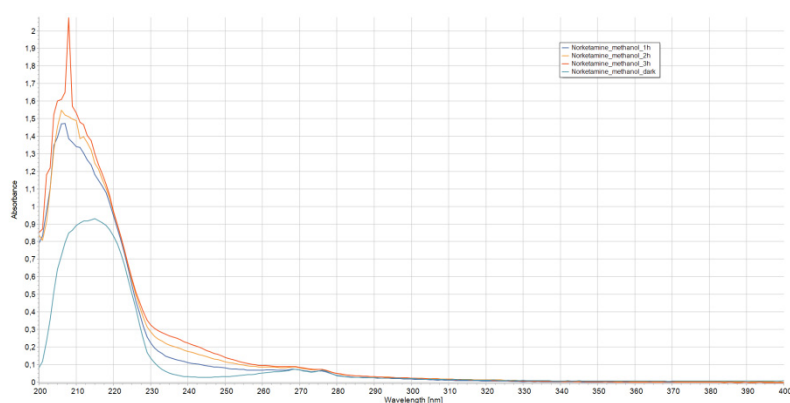

**Figure S1F1**

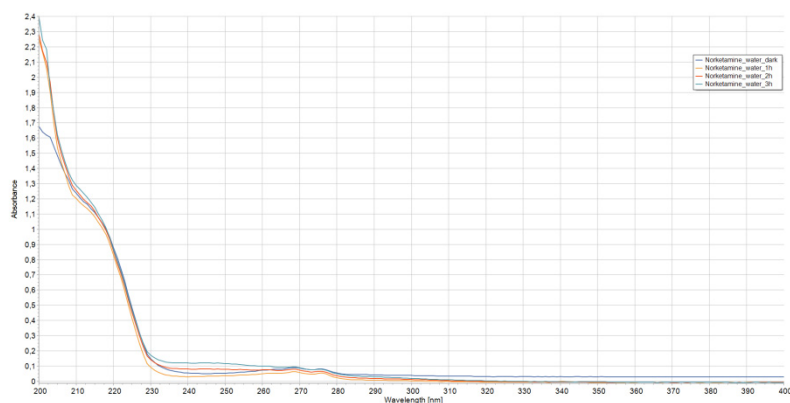

**Figure S1F2**

### Captions for figures

**Fig S1A1/A2.** UV spectrum of AMF ( $10^{-4}$  M) in methanol/water, by increasing exposure time in solar simulator

**Fig S1B1/B2.** UV spectrum of MA ( $10^{-4}$  M) in methanol/water, by increasing exposure time in solar simulator

**Fig S1C1/C2.** UV spectrum of MDA ( $10^{-4}$  M) in methanol/water , by increasing exposure time in solar simulator

**Fig S1D1/D2.** UV spectrum of MDMA( $10^{-4}$  M) in methanol/water, by increasing exposure time in solar simulator

**Fig S1E1/E2.** UV spectrum of KET ( $10^{-4}$  M) in methanol/water by increasing exposure time in solar simulator

**Fig S1F1/F2.** UV spectrum of NKET ( $10^{-4}$  M) in methanol/water, by increasing exposure time in solar simulator
